# Supplementary material for: First Description of the Composition and the Functional Capabilities of the Skin Microbial Community Accompanying Severe Scabies Infestation in Humans
Source: MDPI journal article supplement (doi:10.3390/microorganisms9050907), 2021-04-23

## **SUPPLEMENTARY APPENDIX**

### **First description of the composition and the functional capabilities of the skin microbial community accompanying severe scabies infection in humans**

Charlotte Bernigaud <sup>1,2,3,\*</sup>, Martha Zakrzewski <sup>4,\*</sup>, Sara Taylor <sup>1</sup>, Pearl M. Swe <sup>1</sup>, Anthony T. Papenfuss <sup>5,6</sup>, Kadaba S. Sriprakash <sup>1</sup>, Deborah Holt <sup>7</sup>, Olivier Chosidow <sup>2,3</sup>, Bart J. Currie <sup>7,8</sup>, and Katja Fischer <sup>1</sup>

<sup>1</sup>Infectious Diseases Program, Biology Department, Scabies Laboratory, QIMR Berghofer Medical Research Institute, Brisbane, Australia

<sup>2</sup>APHP, Hôpital Henri-Mondor, Department of Dermatology, Université Paris-Est, Créteil, France

<sup>3</sup>Research Group Dynamic, EA7380, Faculté de Santé de Créteil, Ecole Nationale Vétérinaire d'Alfort, USC ANSES, Université Paris-Est Créteil, Créteil, France

<sup>4</sup>Genetics and Computational Biology Department, QIMR Berghofer Medical Research Institute, Brisbane, Australia

<sup>5</sup>Bioinformatics Division, The Walter and Eliza Hall Institute of Medical Research, Parkville, Victoria, Australia

<sup>6</sup>Department of Medical Biology, University of Melbourne, Melbourne, Victoria, Australia

<sup>7</sup>Menzies School of Health Research, Charles Darwin University, Darwin, Australia

<sup>8</sup>Department of Infectious Diseases, Royal Darwin Hospital, Darwin, Australia

\*C. Bernigaud and M. Zakrzewski contributed equally to this article.

# SUPPLEMENTARY APPENDIX

## CONTENTS

|                                                                                                                                                                        |           |
|------------------------------------------------------------------------------------------------------------------------------------------------------------------------|-----------|
| <b>MATERIALS AND METHODS</b> .....                                                                                                                                     | 3         |
| 1. Localisation of <i>A. baumannii</i> , <i>S. pyogenes</i> , <i>S. dysgalactiae</i> , and <i>S. aureus</i> in the scabies mite and in the surrounding human skin..... | 3         |
| <b>Figure S1. Testing of the specificity of primary antibodies.....</b>                                                                                                | <b>3</b>  |
| <b>RESULTS</b> .....                                                                                                                                                   | 4         |
| 1. Assembly and strain-level identification of two complete bacterial genomes from the scabies-associated microbiome of Patient A.....                                 | 4         |
| <b>Figure S2. Alignment dot plots</b> .....                                                                                                                            | <b>4</b>  |
| <b>Table S1. The 38 contigs of the metagenome-assembled genome MAG-2 blast to <i>A. baumannii</i> genomes in the NCBI nucleotide database.....</b>                     | <b>9</b>  |
| 2. Metabolic pathways analysis using KEGG pathways.....                                                                                                                | 10        |
| <b>Figure S3. Mapping of the genes and contigs to KEGG pathways.....</b>                                                                                               | <b>10</b> |

## MATERIALS AND METHODS

1. Localisation of *A. baumannii*, *S. pyogenes*, *S. dysgalactiae*, and *S. aureus* in the scabies mite and in the surrounding human skin

### Figure S1. Testing of the specificity of primary antibodies.

Primary antibodies were tested using reference strains, *i.e.* *S. aureus* MSSA CC75 M (a), *A. baumannii* ATCC19606 (b), *S. pyogenes* 2031 Type strain emm1 (c), *S. agalactiae* 18RS21 Type II (d), and *S. dysgalactiae* NS3396 emm-type STG-480 (e). Each bacterial strain was stained with all three primary antibodies, *i.e.* *S. aureus* polyclonal anti-rabbit antibodies (My BioSource) (a), *A. baumannii* polyclonal anti-rabbit antibodies (Life span Biosciences) (b), and *S. pyogenes* polyclonal anti-goat antibodies (My BioSource) (c-e); to ensure that there was no cross-reactivity between each strain. Using the Zeiss 780-NLO confocal microscope no cross-reactivity was seen, and staining of the appropriate bacteria with the appropriate antibody was demonstrated. However, as can be seen in figures 7c-e the Streptococcal antibody was not species specific.

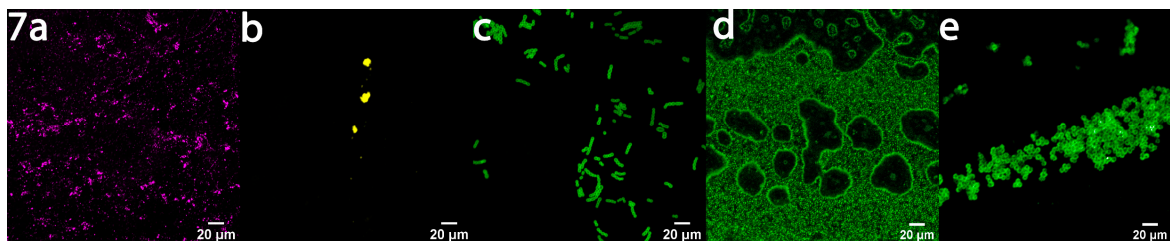

## RESULTS

### *1. Assembly and strain-level identification of two complete bacterial genomes from the scabies-associated microbiome of Patient A*

#### **Figure S2. Alignment dot plots.**

Reference genomes were selected using the strain-level identification tool PanPhlAn. The figure shows the plots of mapping the metagenome-assembled genome (MAG) contigs onto reference sequences. Each reference sequence is positioned on the x axis, the contigs for the MAG are listed on the Y axis. Each red line represents a contig from a MAG and illustrates the position and orientation of the contig on the reference genome. Plot were generated using MUMMER (version 3.5).

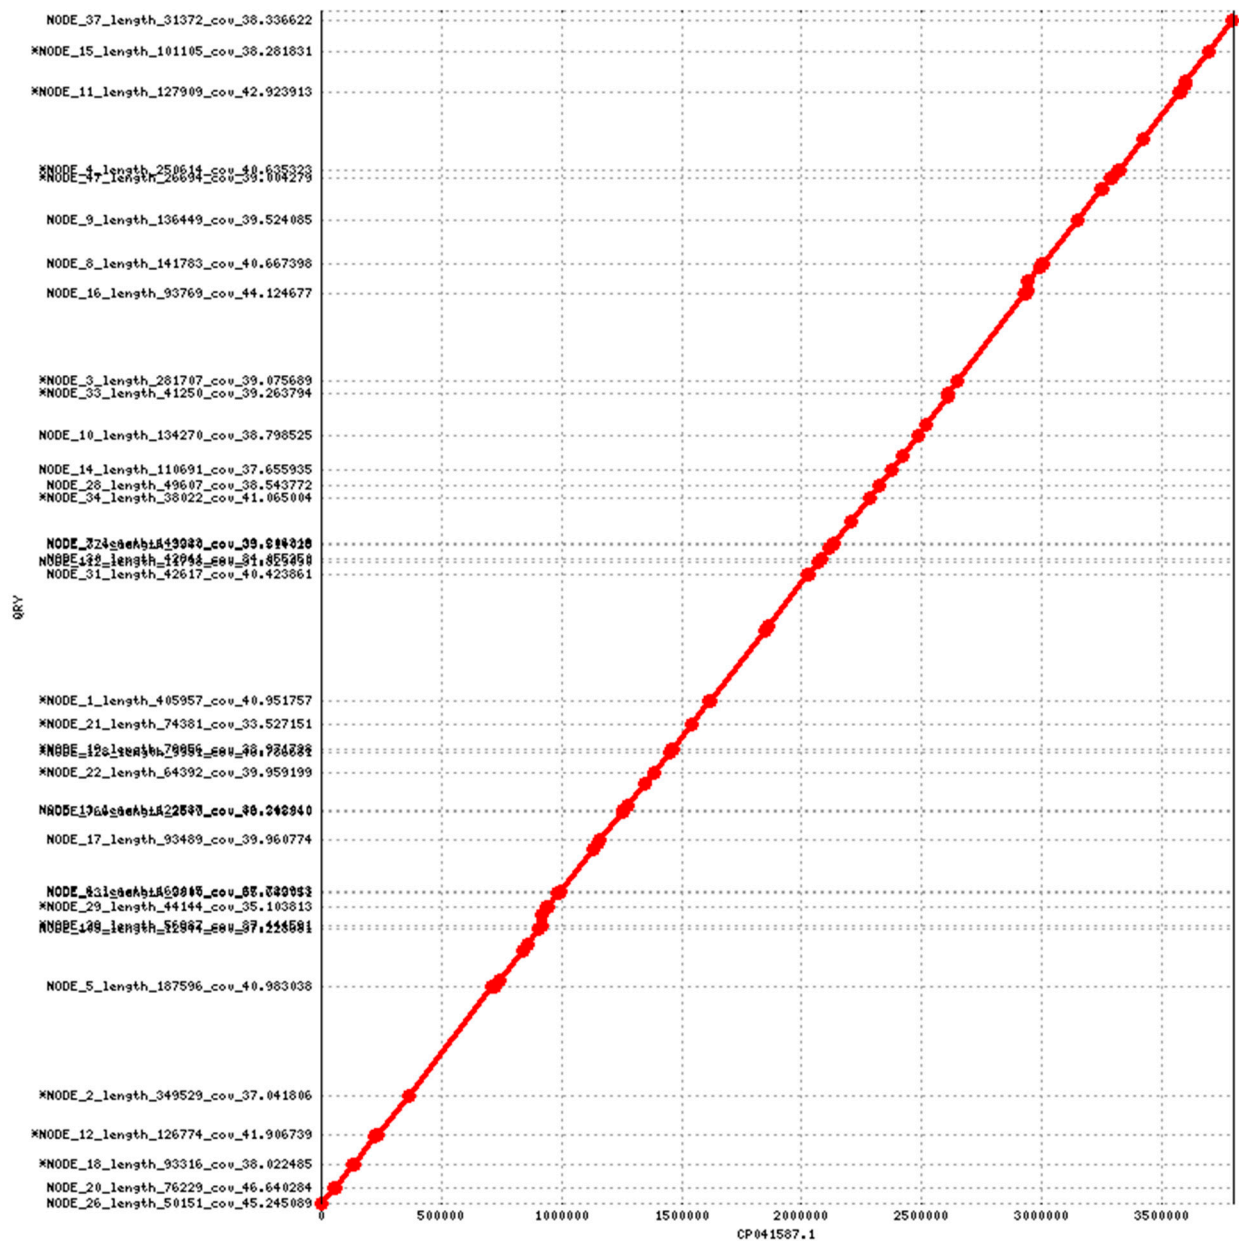

**A. Mummer plot of the MAG-2 onto reference sequence of *Acinetobacter baumannii* J9 (NZ\_CP041587.1) (sample from Patient A).**





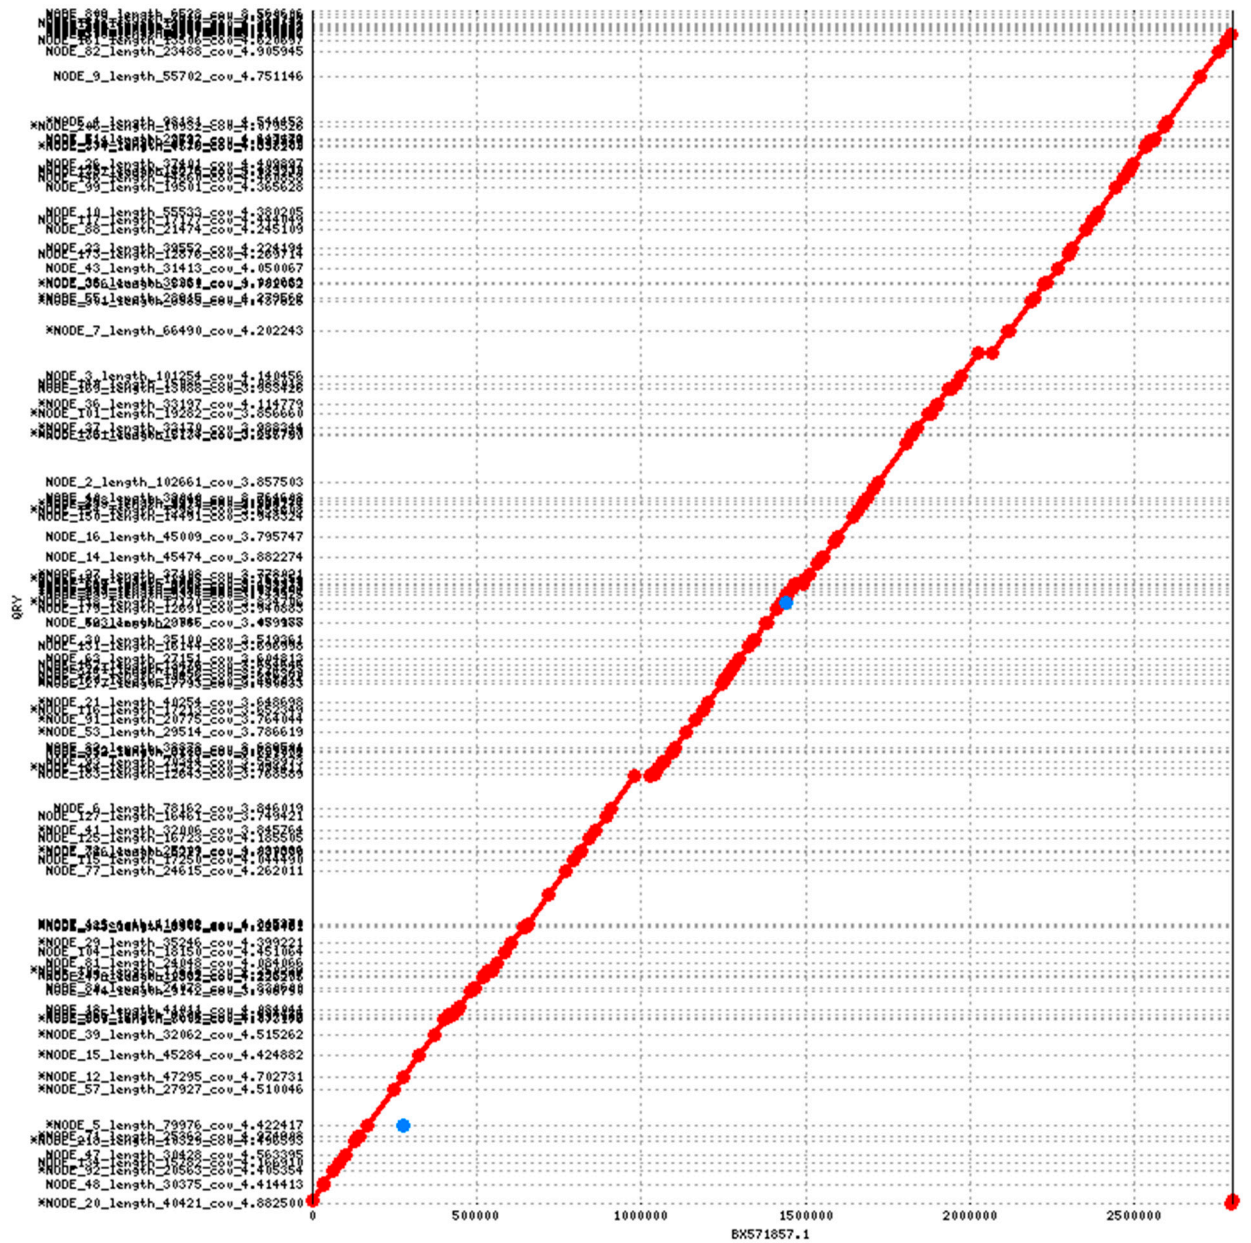

C. Mummer plot of MAG-1 onto reference sequence of *S. aureus* (BX571857) (sample from patient B).

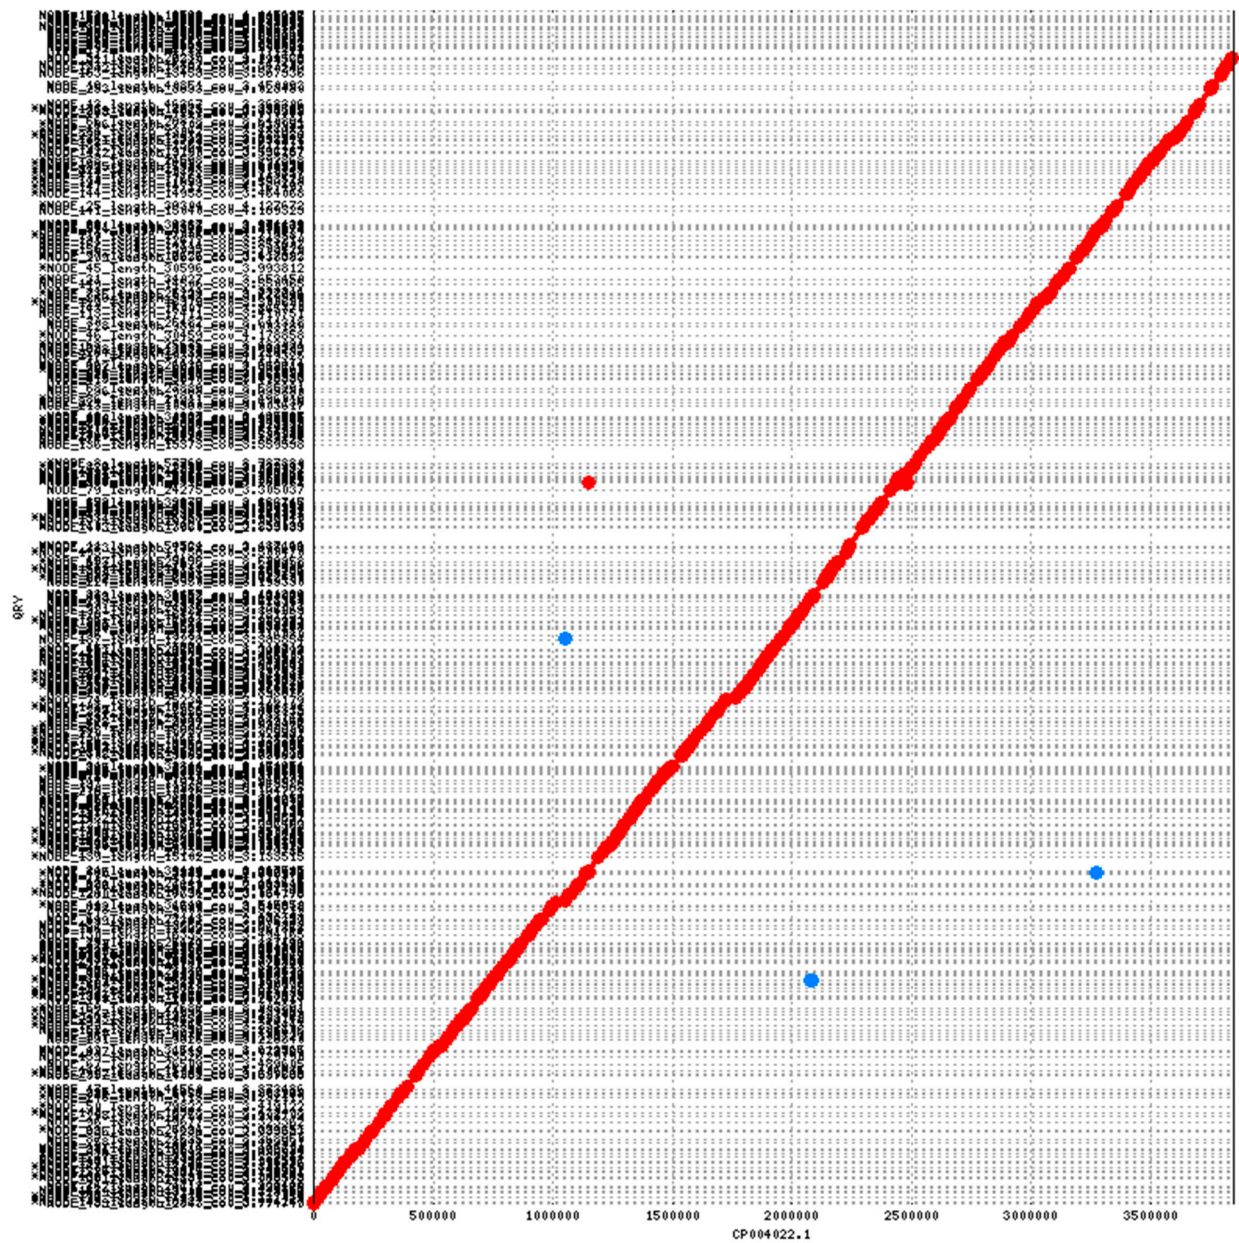

**D. Mummer plot of MAG-3 onto reference sequence of *Proteus mirabilis* (CP004022\_Proteus) (sample from Patient B).**



**Table S1. The 38 contigs of the metagenome-assembled genome MAG-2 blast to *A. baumannii* genomes in the NCBI nucleotide database.**

The *Moraxellaceae*-related metagenome-assembled genome (MAG-2) consisted of 38 contigs with 3,608 predicted genes based on metagenemark prediction. Similarity searches using BLAST to the NCBI nucleotide database revealed that the contigs were highly similar to *A. baumannii* J9 and *A. baumannii* 29FS20 (NZ\_CP044519.1).

| Contig ID                           | Best BLAST Hit                                                 |
|-------------------------------------|----------------------------------------------------------------|
| NODE_1_length_405957_cov_40.951757  | NZ_CP041587.1 Acinetobacter baumannii strain J9                |
| NODE_2_length_349529_cov_37.041806  | NZ_CP041587.1 Acinetobacter baumannii strain J9                |
| NODE_3_length_281707_cov_39.075689  | NZ_CP041587.1 Acinetobacter baumannii strain J9                |
| NODE_4_length_250614_cov_40.635323  | NZ_CP041587.1 Acinetobacter baumannii strain J9                |
| NODE_5_length_187596_cov_40.983038  | NZ_CP041587.1 Acinetobacter baumannii strain J9                |
| NODE_6_length_162015_cov_37.722913  | NZ_CP041587.1 Acinetobacter baumannii strain J9                |
| NODE_7_length_149223_cov_39.206318  | NZ_CP051866.1 Acinetobacter baumannii strain Ab-C63            |
| NODE_8_length_141783_cov_40.667398  | NZ_CP041587.1 Acinetobacter baumannii strain J9                |
| NODE_9_length_136449_cov_39.524085  | NZ_CP041587.1 Acinetobacter baumannii strain J9                |
| NODE_10_length_134270_cov_38.798525 | NZ_CP041587.1 Acinetobacter baumannii strain J9                |
| NODE_11_length_127909_cov_42.923913 | NZ_CP041587.1 Acinetobacter baumannii strain J9                |
| NODE_12_length_126774_cov_41.906739 | NZ_CP041587.1 Acinetobacter baumannii strain J9                |
| NODE_13_length_122587_cov_36.242010 | NZ_LN997846.1 Acinetobacter baumannii isolate R2091 chromosome |
| NODE_14_length_110691_cov_37.655935 | NZ_CP044517.1 Acinetobacter baumannii strain 31FS3-2           |
| NODE_15_length_101105_cov_38.281831 | NZ_CP041587.1 Acinetobacter baumannii strain J9                |
| NODE_16_length_93769_cov_44.124677  | NZ_CP044517.1 Acinetobacter baumannii strain 31FS3-2           |
| NODE_17_length_93489_cov_39.960774  | NZ_CP041587.1 Acinetobacter baumannii strain J9                |
| NODE_18_length_93316_cov_38.022485  | NZ_CP041587.1 Acinetobacter baumannii strain J9                |
| NODE_19_length_79956_cov_33.971728  | NZ_CP041587.1 Acinetobacter baumannii strain J9                |
| NODE_20_length_76229_cov_46.640284  | NZ_CP041587.1 Acinetobacter baumannii strain J9                |
| NODE_21_length_74381_cov_33.527151  | NZ_CP041587.1 Acinetobacter baumannii strain J9                |
| NODE_22_length_64392_cov_39.959199  | NZ_CP041587.1 Acinetobacter baumannii strain J9                |
| NODE_23_length_56887_cov_37.444591  | NZ_CP028138.1 Acinetobacter baumannii strain NCIMB 8209        |
| NODE_26_length_50151_cov_45.245089  | NZ_CP015364.1 Acinetobacter baumannii strain 3207              |
| NODE_28_length_49607_cov_38.543772  | NZ_CP041587.1 Acinetobacter baumannii strain J9                |
| NODE_29_length_44144_cov_35.103813  | NZ_CP041587.1 Acinetobacter baumannii strain J9                |
| NODE_30_length_42841_cov_34.055250  | NZ_CP033768.1 Acinetobacter baumannii strain FDAARGOS_533      |
| NODE_31_length_42617_cov_40.423861  | NZ_CP041587.1 Acinetobacter baumannii strain J9                |
| NODE_33_length_41250_cov_39.263794  | NZ_CP041587.1 Acinetobacter baumannii strain J9                |
| NODE_34_length_38022_cov_41.065004  | NZ_CP041587.1 Acinetobacter baumannii strain J9                |

|                                     |                                                              |
|-------------------------------------|--------------------------------------------------------------|
| NODE_37_length_31372_cov_38.336622  | NZ_CP038503.1 Acinetobacter baumannii strain CIAT758 plasmid |
| NODE_47_length_26694_cov_39.004279  | NZ_CP041587.1 Acinetobacter baumannii strain J9              |
| NODE_105_length_12544_cov_37.228681 | NZ_CP038258.1 Acinetobacter baumannii strain 39741           |
| NODE_112_length_11798_cov_31.829090 | NZ_CP041587.1 Acinetobacter baumannii strain J9              |
| NODE_128_length_9951_cov_46.786681  | NZ_CP041587.1 Acinetobacter baumannii strain J9              |
| NODE_131_length_9800_cov_55.649051  | NZ_CP041587.1 Acinetobacter baumannii strain J9              |
| NODE_374_length_3940_cov_35.514028  | NZ_CP041587.1 Acinetobacter baumannii strain J9              |
| NODE_766_length_2549_cov_43.308340  | NZ_CP047973.1 Acinetobacter baumannii strain DETAB-P2        |

## 2. Metabolic pathways analysis using KEGG pathways

### Figure S3. Mapping of the genes and contigs to KEGG pathways.

(A) Metabolic pathway ‘Bacterial invasion’, (B) Metabolic pathway ‘Staphylococcus infection’ and (C) Metabolic pathway ‘Cationic antimicrobial peptides’. Only *S. aureus* pathway is shown. Color: green identified in patient A and B; orange: only identified in patient A; yellow: only identified in patient B; red: not identified in patient A and B

A.

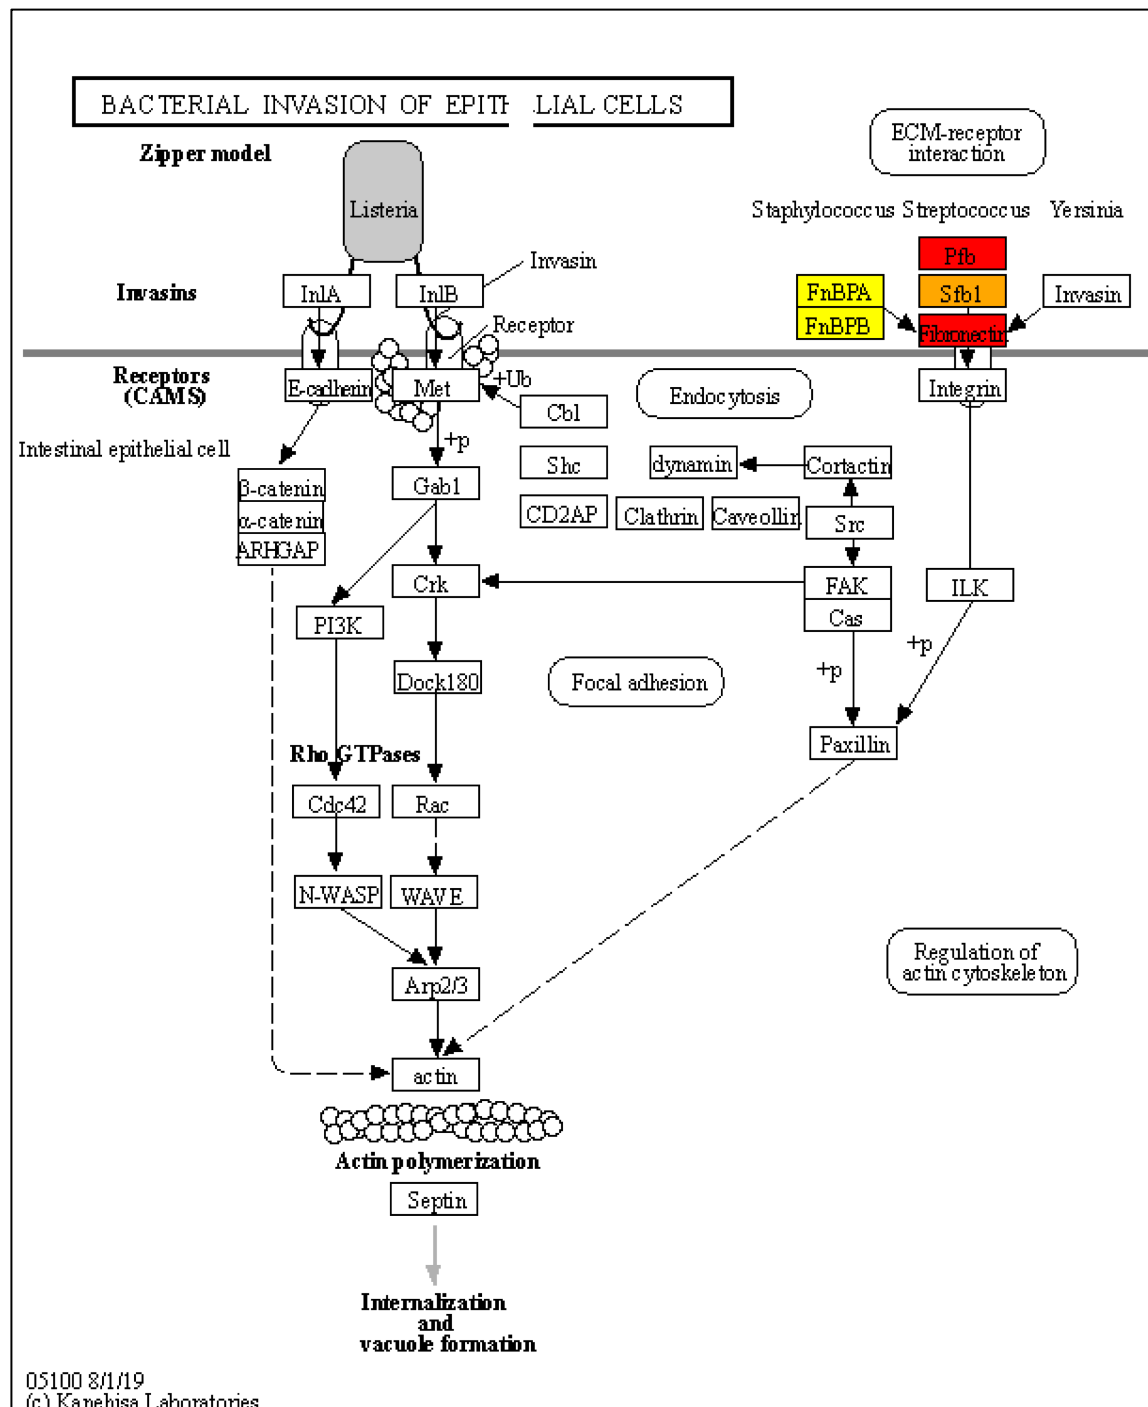

B.

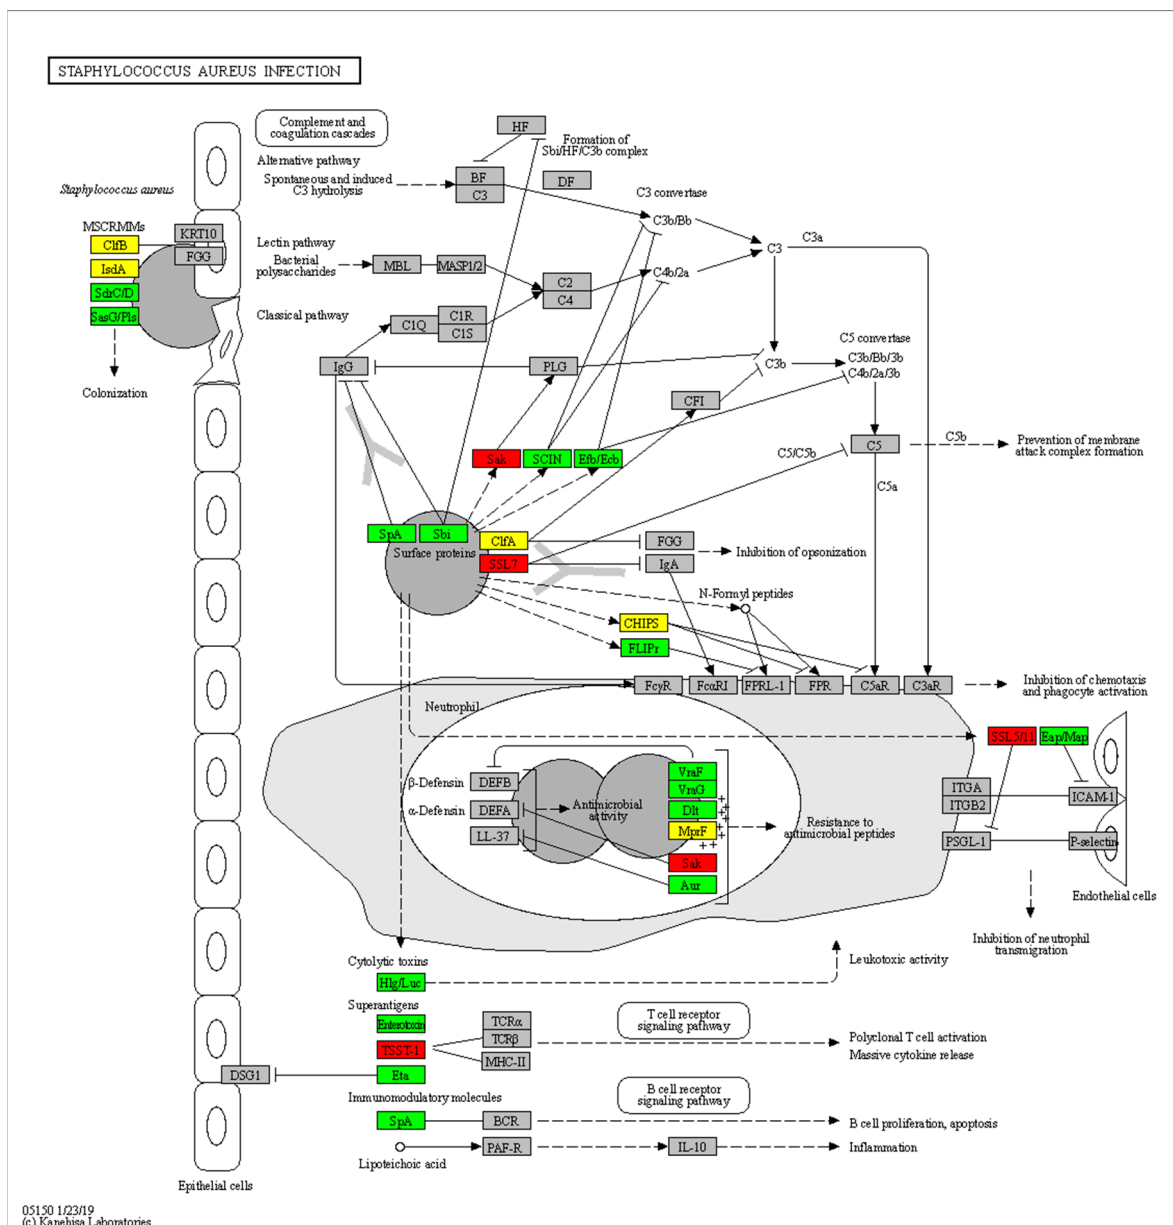



C.

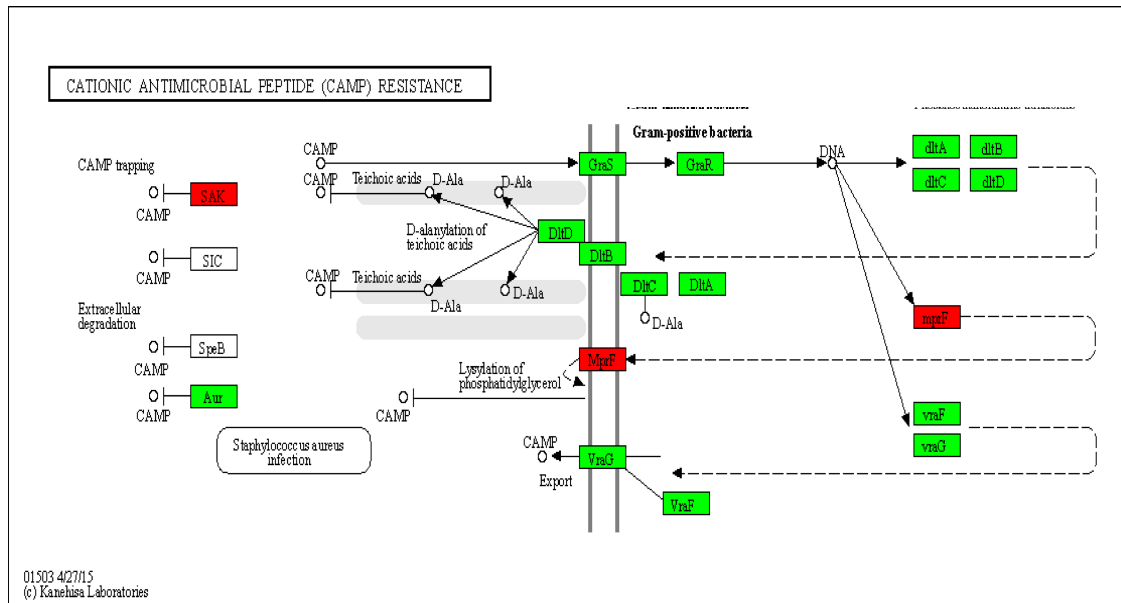

Supplement: s1 [file s1]
